# Supplementary material for: New Element Organic Frameworks Based on Sn, Sb, and Bi, with Permanent Porosity and High Catalytic Activity
Source: MDPI journal article supplement (doi:10.3390/ma3042447), 2010-03-30

## Supporting Information

**Table S1.** Used chemicals.

| Chemical product                  | formula                                            | purity        | company        |
|-----------------------------------|----------------------------------------------------|---------------|----------------|
| 4,4'-dibromobiphenyl              | C <sub>12</sub> H <sub>8</sub> Br <sub>2</sub>     | 99%           | Acros Organics |
| <i>n</i> -butyl lithium in hexane | CH <sub>3</sub> (CH <sub>2</sub> ) <sub>3</sub> Li | 2.5 M         | Acros Organics |
| Bismuthchloride                   | BiCl <sub>3</sub>                                  | >98%          | Acros Organics |
| Antimonychloride                  | SbCl <sub>3</sub>                                  | 99+%          | Sigma Aldrich  |
| Tinchloride                       | SnCl <sub>4</sub>                                  | 99% anhydrous | Acros Organics |
| Benzaldehyde                      | C <sub>6</sub> H <sub>5</sub> CHO                  | ≥98%          | Acros Organics |
| Trimethylsilylcyanide             | (CH <sub>3</sub> ) <sub>3</sub> SiCN               | 98%           | ABCR           |

**Table S2.** Results of elemental analysis.

| EOF   | element | Calculated / wt | 1 <sup>st</sup> detection / wt | 2 <sup>nd</sup> detection / wt |
|-------|---------|-----------------|--------------------------------|--------------------------------|
| EOF-3 | C       | 68.13           | 58.38                          | 58.42                          |
|       | H       | 3.81            | 3.90                           | 3.87                           |
| EOF-4 | C       | 61.76           | 57.87                          | 57.95                          |
|       | H       | 3.46            | 3.74                           | 3.82                           |
| EOF-5 | C       | 49.44           | 44.61                          | 44.59                          |
|       | H       | 2.77            | 2.51                           | 2.52                           |

**Figure S1.** TG and DTA (broken line) of EOF-3 (left) and -5 (right).

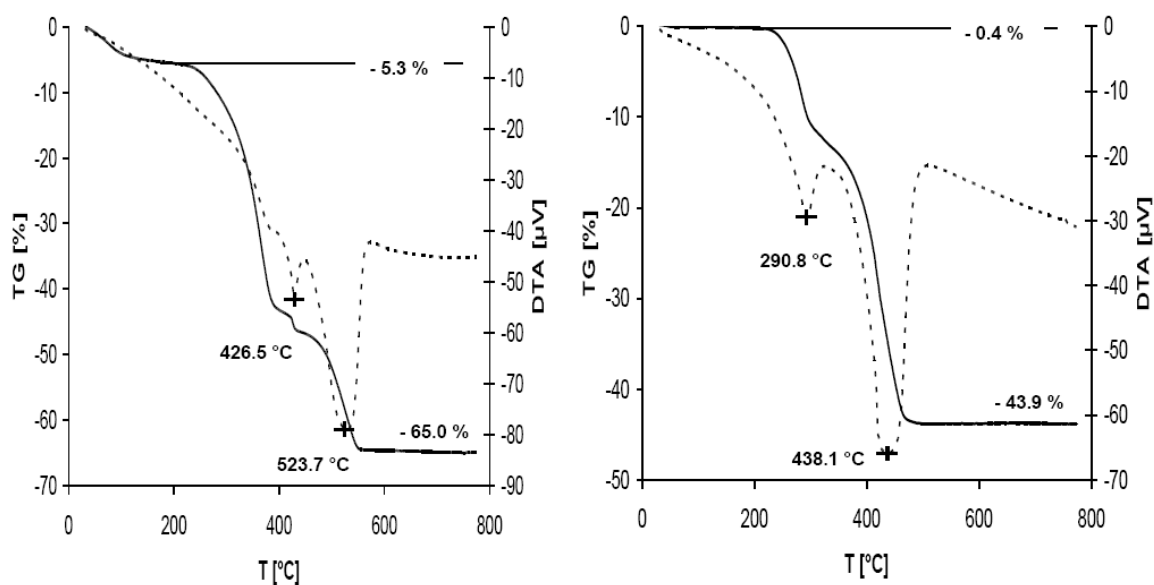

**Figure S2.**  $^1\text{H}$  MAS NMR spectra of EOF-4 (top) and EOF-5 (bottom) (\* spinning sidebands).

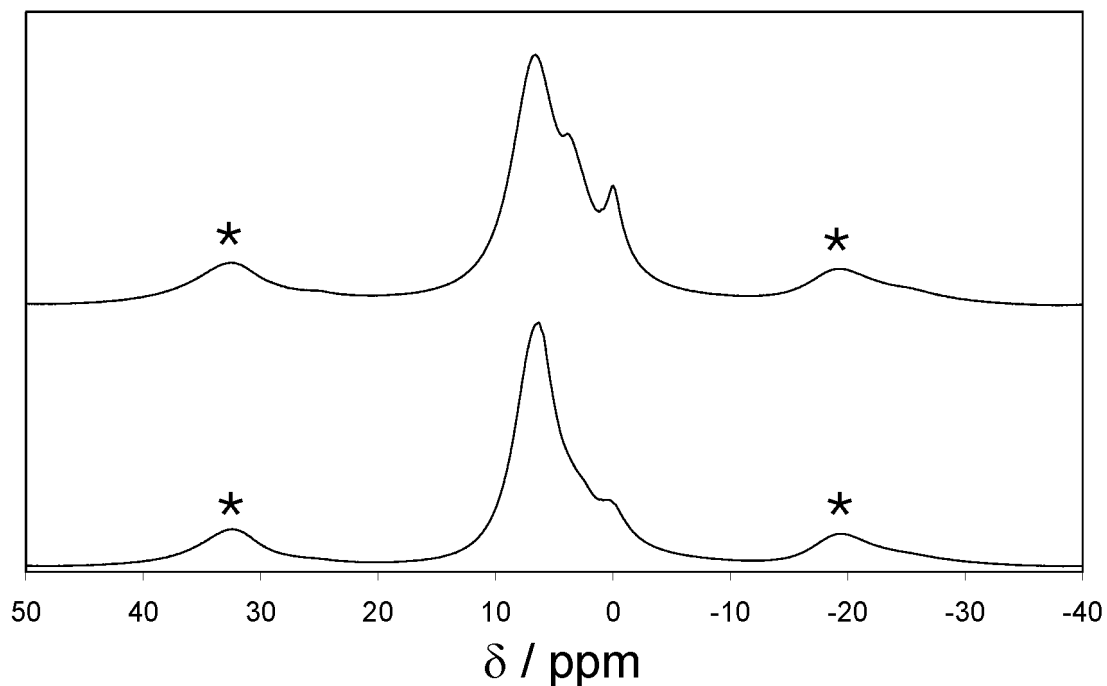

**Figure S3.** Hydrogen physisorption isotherms of EOF-3 (diamonds), -4 (squares) and -5 (triangles) measured at 77 K.

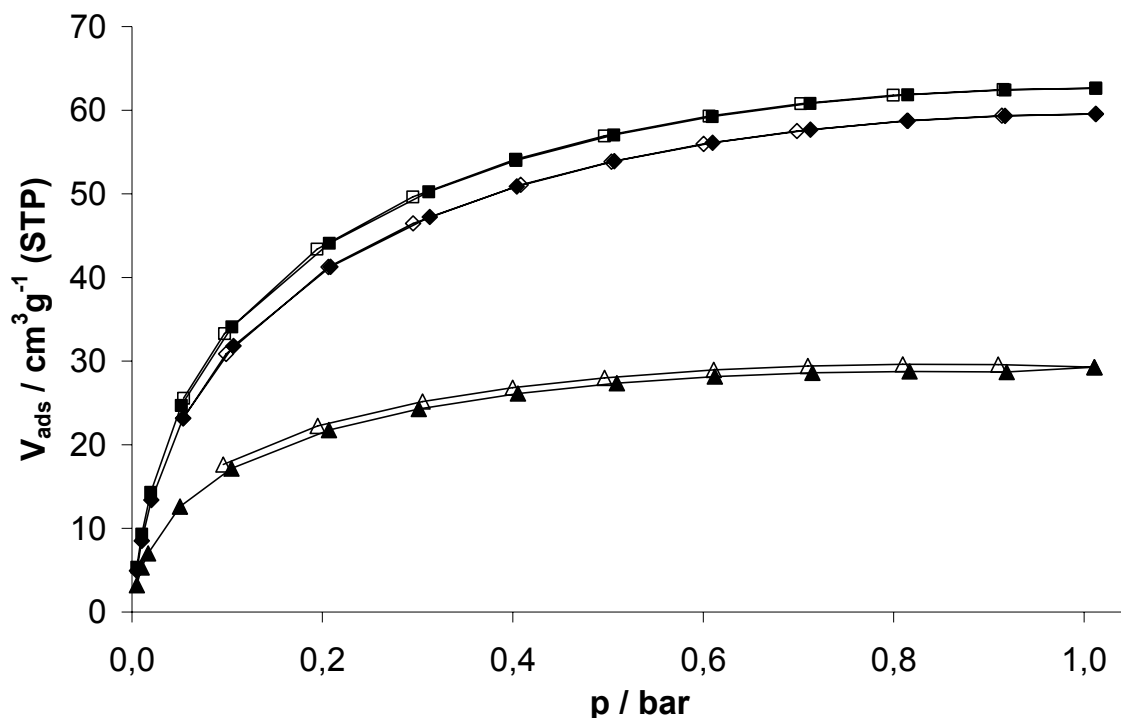

Supplement: s1 [file s1]
